# Supplementary material
Source: Springer Nature journal article supplement (https://www.springermedizin.de/resource/supplementary/12968_2010_1428_MOESM4_ESM.pdf/9580110)

## 2-compartment model

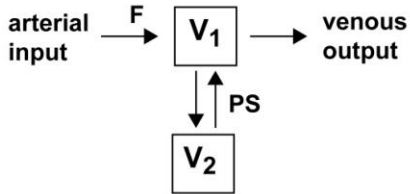

a)

b) Tracer Concentration [a.u.]

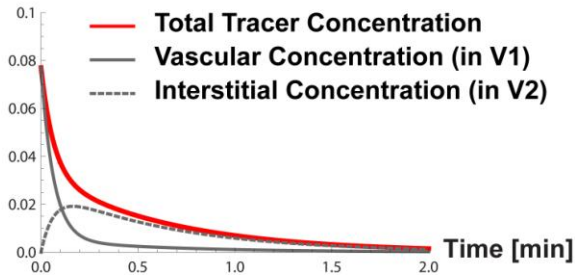

b)

Supplement: MOESM4 [file 9580110]
